# Supplementary material for: Rapid Development and Characterization of Chromosome Specific Translocation Line of Thinopyrum elongatum with Improved Dough Strength
Source: Front Plant Sci. 2017 Sep 14;8:1593. doi: 10.3389/fpls.2017.01593 (PMC5604074; doi:10.3389/fpls.2017.01593)
Supplement: Supplementary file 2 [file DataSheet1.XLSX]

## Sheet: Sheet1
Marker	forward	reverse	tm	expected size	chromosome
barc102M-13-40	TTTCCCAGTCACGACGTTGGA GAG GAC CTG CTA AAA TCG AAG ACA	GCG TTT ACG GAT CAG TGT TGG AGA	52	188	3BS
BARC107-M13F-20	TGTAAAACGACGGCCAGTCGAACTGAAACTGAAAACACAGACATC	AGGGAGAGTGGACGTCATAATTTGTG	50	190	6AL
barc108	GCG GGT CGT TTC CTG GAA ATT CAT CTA A	GCG AAA TGA TTG GCG TTA CAC CTG TTG	50	156	7AS
barc111	GCG GTC ACC AGT AGT TCA ACA	GCG TAT CCC ATT GCT CTT CTT CAC TAA C	50	174	7DL
BARC1118-M13F-20	TGTAAAACGACGGCCAGTCGCAGTTGCCTCCCTTGTTAGATGTT	CGCTTATTCCTTTCTCATTGGGTTTG	52	194	4DS
BARC1183-M13F-20	TGTAAAACGACGGCCAGTTCCCGCCCTCTCTAGACGAAACTGT	CGGGAAAGGAAAGGAGCTTACGGT	60	254	5AL
barc119	CAC CCG ATG ATG AAA AT	GAT GGC ACA AGA AAT GAT	55	208	1A-1D-3D
BARC126-M13F-20	TGTAAAACGACGGCCAGTCCATTGAAACCGGATTTGAGTCG	CGTTCCATCCGAAATCAGCAC	52	164	7DS
BARC137-M13F-20	TGTAAAACGACGGCCAGTGGCCCATTTCCCACTTTCCA	CCAGCCCCTCTACACATTTT	52	244	1BL
BARC141-M13F-20	TGTAAAACGACGGCCAGTGGCCCATGGATAATTTTTGAAATG	CAATTCGGCCAAAGAAGAAGTCA	52	250	5AL
BARC143-M13F-20	TGTAAAACGACGGCCAGTTTGTGCCAAATCAAGAACAT	GGTTGGGCTAGGATGAAAAT	52	232	5DS
barc147	GCG CCA TTT ATT CAT GTT CCT CAT	CCG CTT CAC ATG CAA TCC GTT GAT	Tm 52°	105	3BS
barc148	GCG CAA CCA CAA TGT ATG CT	GGG GTG TTT TCC TAT TTC TT	52	196	1AL
BARC15-M13F-20	TGTAAAACGACGGCCAGTATGCAAAGGCCGGGGTTATC	CACCTCTAGCCTACGCCAACATT	52	102	2AL
BARC164-M13F-20	TGTAAAACGACGGCCAGTTGCAAACTAATCACCAGCGTAA	CGCTTTCTAAAACTGTTCGGGATTTCTAA		206	3BL
barc17	GCG CAA CAT ATT CAG CTC AAC A	TCC ACA TCT CGT CCC TCA TAG TTT G	50	272	1AL
BARC170-M13F-20	TGTAAAACGACGGCCAGTCGCTTGACTTTGAATGGCTGAACA	CGCCCACTTTTTACCTAATCCTTTTGAA		163	4AL
barc172	GCG AAA TGT GAT GGG GTT TAT CTA	GCG ATT TGA TTT AAC TTT AGC AGT GAG	50	182	7D-5B
BARC174-M13F-20	TGTAAAACGACGGCCAGTTGGCATTTTTCTAGCACCAATACAT	GCGAACTGGACCAGCCTTCTATCTGTTC	52	170	1BL
barc184	TTC GGT GAT ATC TTT TCC CCT TGA	CCG AGT TGA CTG TGT GGG CTT GCT G	58	216	7D-4A
BARC198-M13F-20	TGTAAAACGACGGCCAGTCGCTGAAAAGAAGTGCCGCATTATGA	CGCTGCCTTTTCTGGATTGCTTGTCA	50	145	6BS
BARC214-M13F-20	TGTAAAACGACGGCCAGTCGCTTTCGGGACAGTGAAGGTGTAT	CGGTACGCGCGAGGAGGAAGAAGG	52	219	7DS
barc24	CGC CTC TTA TGG ACC AGC CTA T	GCG GTG AGC CAT CGG GTT ACA AAG	53	188	6BL
BARC243-M13F	TGTAAAACGACGGCCAGTCGCAAAATCGAAATTAAAAATGGAAA	GATCCTCCTTTCAGCTGGCCTATTA	50	221	5BL
BARC275-M13F-20	TGTAAAACGACGGCCAGTGCGTTTGGTCAGAATAGGGAAGAT	GCGTATGTTCGTGTTAGTGTTGGTTATGC	50	267	7AL
BARC284-M13F-20	TGTAAAACGACGGCCAGTGCGTCAGAAATGCAAGAAAAATAGG	GCGGAAGAAAAGGACGAAGACAAG	50	232	3AL
BARC28-M13F-20	TGTAAAACGACGGCCAGTCTCCCCGGCTAGTGACCACA	GCGGCATCTTTCATTAACGAGCTAGT	55	215	1AS
barc3	TTCCCTGTGTCTTTCTAATTTTTTTT	GCGAACTCCCGAACATTTTTAT	52	188	6AS
BARC343-M13F-20	TGTAAAACGACGGCCAGTGGCCTAATTACAAGTCCAAAAG	GCTCAAAGTAAAGTTCACGAATAT		154	4AL
BARC356-M13F-20	TGTAAAACGACGGCCAGTCGCTAGAGCTGTTTGAGGGGAGGAG	CGCATGTAGGGGGAGGCTTCTTTT	57	150	3AS
BARC360-M13F-20	TGTAAAACGACGGCCAGTGCGATGGCAAAAACTGTGACC	GCGCTCCAGCAGATACATAAGATAAC	50	300	5AL
BARC4-M13F-20	TGTAAAACGACGGCCAGTCGCAGTTGCCTCCCTTGTTAGATGTT	CACCACACATGCCACCTTCTTT	52	158	5BS
barc5	GCGCCTGGACCGGTTTTCTATTTT	GCGTTGGGAATTCCTGAACATTTT	52		2AS
barc62	TTG CCT GAG ACA TAC ATA CAC CTA A	GCC AGA ACA GAA TGA GTG CT	52		1DL
barc66	CGC GAT CGA TCT CCC GGT TTG CT	GGG AAG AGG ACC AAG GCC ACT A	55		1DL
barc67	GCG GCA TTT ACA TTT CAG ATA GA	TGT GCC TGA TTG TAG TAA CGT ATG TA	Tm 52°	104	3AS
BARC6-M13F-20	TGTAAAACGACGGCCAGTTTCGGTCGTTGAGGTGACCAATTATG	GACAAAGGATTAGCCCAAAGTAAGAG	52	471	3DS
BARC71-M13F-20	TGTAAAACGACGGCCAGTGCGCTTGTTCCTCACCTGCTCATA	GCGTATATTCTCTCGTCTTCTTGTTGGTT		112	3DL
barc80	GCG AAT TAG CAT CTG CAT CTG TTT GAG	CGG TCA ACC AAC TAC TGC ACA AC	52	110	1BL
barc83	AAG CAA GGA ACG AGC AAG AGC AGT AG	TGG ATT TAC GAC GAC GAT GAA GAT GA	58	270	1AL
barc84	CGC ATA ACC GTT GGG AAG ACA TCT G	GGT GCA ACT AGA ACG TAC TTC CAG TC	Tm 58°	110	3BL
BARC8-M13F-20	TGTAAAACGACGGCCAGTGCGGGAATCATGCATAGGAAAACAGAAAA	GCGGGGGCGAAACATACACATAAAAACA	50	245	3DS
Cfa2019M-13-40	TTTCCCAGTCACGACGTTGACGAGCTAACTGCAGACCC	CTCAATCCTGATGCGGAGAT	60	217	7AL
cfa2049	TAATTTGATTGGGTCGGAGC	CGTGTCGATGGTCTCCTTG	60	164	7AS
cfa2076	CGAAAAACCATGATCGACAG	ACCTGTCCAGCTAGCCTCCA	Tm 60°	172	3AL
Cfa2123M-13-40	TTTCCCAGTCACGACGTTCGGTCTTTGTTTGCTCTAAACC	ACCGGCCATCTATGATGAAG	60	259	7AL
cfa2129	GTTGCACGACCTACAAAGCA	ATCGCTCACTCACTATCGGG	60	159	1A-1B-1D
CFA2153	TTGTGCATGATGGCTTCAAT	CCAATCCTAATGATCCGCTG	60		1AS
cfa2153-M13F-20	TGTAAAACGACGGCCAGTTTGTGCATGATGGCTTCAAT	CCAATCCTAATGATCCGCTG	60	200	1AS
cfa2185	TTCTTCAGTTGTTTTGGGGG	TTTGGTCGACAAGCAAATCA	60	226	5AL
cfa2190	CAGTCTGCAATCCACTTTGC	AAAAGGAAACTAAAGCGATGGA	60	169	5AL
cfa2193-M13F-20	TGTAAAACGACGGCCAGTACATGTGATGTGCGGTCATT	TCCTCAGAACCCCATTCTTG	60	195	3A
cfa2219	TCTGCCGAGTCACTTCATTG	GACAAGGCCAGTCCAAAAGA	60	223	1AL
cfa2250	AGCCATAGATGGCCCTACCT	CACTCAATGGCAGGTCCTTT	60	295	5AL
cfa2262	ACAATGTGGAGATGGCACAA	TACCAGCTGCACTTCCATTG	Tm 60°	172	3AL
cfa2263-M13F-20	TGTAAAACGACGGCCAGTGGCCATGTAATTAAGGCACA	CTCCCAGGAGTACAGAAGAGGA	60	150	2AS
cfd10	CGTTCTATGACGTGTCATGCT	TCCATTTTCAAAAACACCCTG	60	288	5DL
cfd102	TTGTGGAAGGGTTTGATGAAG	TGCAGGACCAAACATAGCTG	60	299	5DL
cfd116	TTTGCCCATTACAACAAGCA	CAAGCAGCACCTCATGACAG	Tm 60°	225	2DS
cfd132	CAAATGCTAATCCCCGCC	TGTAAACAAGGTCGCAGGTG	60	150	6DS
cfd14	CCACCGGCCAGAGTAGTATT	TCCTGGTCTAACAACGAGAAGA	60	152	7DL
cfd168	CTTCGCAAATCGAGGATGAT	TTCACGCCCAGTATTAAGGC	60	197	2DL
cfd168	CTTCGCAAATCGAGGATGAT	TTCACGCCCAGTATTAAGGC	Tm 60°	197	2A-2D
cfd175	TGTCGGGGACACTCTCTCTT	ACCAATGGGATGCTTCTTTG	60	281	7DL
cfd183	ACTTGCACTTGCTATACTTACGAA	GTGTGTCGGTGTGTGGAAAG	60	179	5DL
cfd18-M13F-20	TGTAAAACGACGGCCAGTCATCCAACAGCACCAAGAGA	GCTACTACTATTTCATTGCGACCA	60	169	5DL
cfd2	GGTTGCAGTTTCCACCTTGT	CATCTATTGCCAAAATCGCA	Tm 60°	288	6AS
cfd233	GAATTTTTGGTGGCCTGTGT	ATCACTGCACCGACTTTTGG	Tm 60°	289	2DS
cfd266	GAAAACAAAACCCATTTGCG	AAGCTTCAGTGCCTTTGGAA	60	192	5DL
cfd29-M13F-20	TGTAAAACGACGGCCAGTGGTTGTCAGGCAGGATATTTG	TATTGATAGATCAGGGCGCA	60	153	5DL
cfd35	GGGATGACACATAACGGACA	ATCAGCGGCGCTATAGTACG	60	191	3DS
cfd40-M13F-20	TGTAAAACGACGGCCAGTGCGACAAGTAATTCAGAACGG	CGCTTCGGTAAAGTTTTTGC	60	223	5DS
cfd43	AACAAAAGTCGGTGCAGTCC	CCAAAAACATGGTTAAAGGGG	Tm 60°	150	2DS
cfd48	ATGGTTGATGGTGGGTGTTT	ATGTATCGATGAAGGGCCAA	60	250	1BL
cfd48	ATGGTTGATGGTGGGTGTTT	ATGTATCGATGAAGGGCCAA	60	250	1B-1D
cfd51-M13F-20	TGTAAAACGACGGCCAGTGGAGGCTTCTCTATGGGAGG	TGCATCTTATCCTGTGCAGC	60	172	2DS
cfd55-M13F-20	TGTAAAACGACGGCCAGTCCAGTAGCCGGCCCTACTAT	GCACGAGATACGGACAATCA	60	263	3DS
cfd56	TTGCATAATTACTTGCCCTCC	CTGGTCCAACTTCCATCCAT	60	221	2DS
cfd57	ATCGCCGTTAACATAGGCAG	TCACTGCTGTATTTGCTCCG	60	291	5DL
cfd58M-13-40	TTTCCCAGTCACGACGTTAATGGGCCTTTAAGAGCAAAA	AGGGGTGAAAGGTTGGAGAC	60	179	1A,1A,1D,1A
cfd59	TCACCTGGAAAATGGTCACA	AAGAAGGCTAGGGTTCAGGC	60	296	1A-1B-1D
cfd61	ATTCAAATGCAACGCAAACA	GTTAGCCAAGGACCCCTTTC	60	218	1DS
cfd63	TCCTGAGGATGTTGAGGACC	GAGAGAGGCGAAACATGGAC	60	275	1DL
cfd65	AGACGATGAGAAGGAAGCCA	CCTCCCTTGTTTTTGGGATT	60	199	1BS
cfd66-M13F-20	TGTAAAACGACGGCCAGTAGGTCTTGGTGGTTTTGGTG	TTTTCACATGCCCACAGTTG	60	202	7DS
cfd67	GCGGACAAATTGAGCCTTAG	TGTGCGTGTGTGTGTGTTTT	60	188	5DS
cfd69-M13F-20	TGTAAAACGACGGCCAGTAAATACCTTGAATTGTGAGCTGC	TCTGTTCATCCCCAAAGTCC	60	240	7DL
cfd72	CTCCTTGGAATCTCACCGAA	TCCTTGGGAATATGCCTCCT	60	223	1DL
cfd76-M13F-20	TGTAAAACGACGGCCAGTGCAATTTCACACGCGACTTA	CGCTCGACAACATGACACTT	60	166	6D
cfd8	ACCACCGTCATGTCACTGAG	GTGAAGACGACAAGACGCAA	60	162	5DL
cfd83-M13F-20	TGTAAAACGACGGCCAGTAAGGATGGAGAGGACCCCTA	GGAGGTGGAGCAACCTATCA	60	233	1DS
cfd84-M13F-20	TGTAAAACGACGGCCAGTGTTGCCTCGGTGTCGTTTAT	TCCTCGAGGTCCAAAACATC	60	193	4DL
cfd92	CTTGTTGATCTCCTTCCCCA	TTCTCTCATGACGGCAACAC	60	253	1DS
cfd9-M13F-20	TGTAAAACGACGGCCAGTTTGCACGCACCTAAACTCTG	CAAGTGTGAGCGTCGG		209	3DL
csLV34M-13-40	TTTCCCAGTCACGACGTTGTTGGTTAAGACTGGTGATGG	TGCTTGCTATTGCTGAATAGT	58	120-200	7DS
GDM132-M13F-20	TGTAAAACGACGGCCAGTACCGCTCGGAGAAAATCC	AGGGGGGCAGAGGTAGG	60	144	6DS
gdm33	GGCTCAATTCAACCGTTCTT	TACGTTCTGGTGGCTGCTC	60		1DS
GDM35-M13F-20	TGTAAAACGACGGCCAGTCCTGCTCTGCCCTAGATACG	ATGTGAATGTGATGCATGCA	55	189	2DS
GDM46	TGTGTTGGCCTTGTGGTG	CTACCCAATGCATCCCCTTA	60		7DL
GPW1010	GATGAATTGTGTGCTCGGG	CAGGAAACTGCTTAGCCACC	60	175	4AS
gpw1025	GCAACGCATGTCTCGACTAA	TGATGAATGCTACCTTGGACG	60	228	3BL
gpw1054	GGACCGTTGAAGAAGTGCTC	TAGCAATCCAAATAAGCCGC	60	287	7BS
gpw1056	TATCTGTGGGGTGCAATGTG	GATCTCTTCCTCCCTCTCCC	60	223	5BS
gpw1062	AGGGGCTCCTCTTTAAGTGC	CTCCATTGCCAAAGAGGGTA	60	154	3DL
gpw1072	GGAACACTGCCCATCACATA	CACCTTCAGCACCAGATTCA	60	229	5BS
gpw1077	TTGAGCATGCCTAACACTTG	CGGACGACCACTCAGGTAAG	60		1BL
gpw1079	CAAAGTTTCAATGGCCAGGT	ACTGATGAGGAAACGCCATC	60		6BS
gpw1106	GCAAGAAGAGAAGCACCACC	ATCCACGTATCCTCCACTGC	60	260	3AS
gpw1109	TGCATTTCATTGATCACTGCTT	GAGCCAATTAGTGTATCCCCC	60	164	2BS
gpw1109	TGCATTTCATTGATCACTGCTT	GAGCCAATTAGTGTATCCCCC	60	164	2BS
gpw1145	CTTTACGGATTTCGAGGCAG	AGATGGAAGCATGCGGTAAC	60	187	3BL
gpw1149	CATGTCAAAGCACCAGCAGA	CTTTGGCGCTGAAGTAAAGG	60	192	3DS
gpw1164	TTCATGAAGGGTGTTGTCCA	TCTTCTCCCACCTGTGCTCT	60	186	7BS
gpw1214	AATAAAGCGATGATGGGCAC	GGCGACGACTCTGGACGATA	60	123	2BL
gpw1247	CACATGAGACCAGATGGCAC	CGTCCTCAGCTACCTCCTTG	60	183	2DL
gpw2018	ATGTAGGCAGAGCACACACG	AGTCGATGAAAGGCAGCATC	60	186	2AS
gpw2059	CAACGAGCAGGACGGATAGT	CCGTAAAGATATCCAATCAAAACA	60		198
gpw2060	CGGATGAACAGTTTCTTAAGCC	TGAGATTCCTTGCTATGGACA	60		6ALK
gpw2067	AAAAGAAACACCGTTCGTGC	CAATTTGTTGGGACAAACCC	60		1BS
gpw2090	TCCGTCTATAAAACCCGACG	GTCAAAGAAGACGGTGGGAA	60	226	5DL
gpw2107	CGTGAGGCATGTGAGAAGAA	TTGAGGAACATGGCTAAGGG	60	189	7AS
gpw2118	ACCTTGCTCTTGTCGTCCTG	TTGTCGCTGCTCTTCAACTG	60		1DL
gpw2120	CGAACATGGTTTTAAACGGG	TTTGTTTGTAATATGATGATTCTCG	60		206
gpw2136	ACAGCCGCAAGCTTAAAGAA	CTTACTGCAGAGTTGCAGTGAA	60		233
GPW2160	ATTTACGGCTCGACCACTCA	ACTGGAAAGGGGCGCAAGC	60	171	7DL
gpw2162	GAAATCCCTAACCTGTCCCG	GTCTTCCGGGTAATCCCAAT	60		1DS
gpw2186	TCCGGGAAGGGAACTCTAAG	TAAATCACCGATTCATGGGC	60	240	1AS
gpw2196	CCCTAACCAGAGTGAAGGCA	GCAAGGGGATCTTCTTCCTC	60		1DL
gpw2206	AGACTCACTTTGTGGCATCTGA	GTTTTGCATCAACTCTGCCA	60	234
gpw2220	TGACACCCCTTTCTTATCCG	TAGCGAGGGGGTTAAGTGTG	60	151	4DS
gpw2222	TCTCAGGAGCTAGCAGCACA	CTTCTGCCGATACATCCCAT	60		6AL
gpw2224	GCAGCTCGTTTAGGGATTTG	TACTCTGTTCCCCGCACTCT	60		1DL
gpw2239	CAACCATATGCCCAGGAGAC	TGTTGCTGTCTGAAACAGGG	60	211	4AS
gpw2255	TAGGAGAATGGGGCAAAATT	GCTGCCTGGTAATGCAAAAT	60		1DL
gpw2266	TTTTTGCCCACACGGC	CGTGGAGGTGTCGACCTAAT	60	231	3AL
gpw2277	TCAGAAGAGCGATGAGATAGAAA	GCCATTTTTAGGGCTCAGTG	60		1AS
gpw2323	AGAAGTTGGCTTCCGCTTTC	AGTTGAAGATGGCCCAGATG	60	297	5DL
gpw2344	CAAGCAGCTTCGTCGTGATA	TGTTCATCCGAGATCATGTG	60		6AL
GPW299	CCCTCGGTTATAGTGGGAAA	GCTCGGTGCTACTGGAAAAC	60	221	7DS
gpw3003	GAATCCCAGTTCCCATCACA	TTGGCGAGAGAGAGATGAGG	60	224	5AS
gpw3010	TTTGCTTGGGCTGTCGTC	GGCCACCCTTTTGTCTTCTT	60		1AL
gpw3020	CGAAGGAAAAAGTGGGTGAG	ACAAAATAGGAAAAGGGGCG	60	265	5AS
gpw3032	TGTTTGTGCTCCTCTGTTCG	TGGAAAAGGTTCGGTCTACG	60	230	2BL
gpw3036	TGCCAATGTGCAGTGGTAAT	TGAGCACATCCTCTAAGCCA	60	241	3AS
gpw3038	ACACTTACACGCCCATCTCC	AAGTCAAGGAGGAGGCCATT	60	229	7AL
gpw3044	GGTCCACCTCAACAGTTCGT	ATCAACGCTGAAGAATATCCG	60		1BS
gpw3049	CCCGTCAACTGTGAGATGC	CAGGTGGGATTCTGTCGG	60	331	5AS
gpw3069	TTCAAAGGGGAAACTCAATCC	AATGGAAACCCTGCCGTAG	60		1AL
gpw3087	CTCTAAGAAGTCCAATGCAACA	AATTGCAGAAACTGGATGCC	60		6AS
gpw3090	ATAGAGATCGGGTGCAGGG	AGAAGGATGACAGGGTGGG	60	216	2BL
gpw3101	CAGGGAGATAGAGGGAAGGG	CTAAAATCGCCAGAAGAAGGG	60		6AS
gpw3107	CCAGGGGGGAAGAGAGATAA	ATGCAGAGCAGGGCAAAG	60	247	2DL
gpw3112	CCGCCACGGCTATATTTG	CCGCCACGGCTATATTTG	60	231	7BL
gpw312	GAACTTTCCACCCCATACCC	TTAAGTGAGAAGGAAGCAAAGC	60		6DL
gpw3122	CTATTGGAGCTTGAGAAGAG	GCATTGACTAAGTTGATGAC	60		1BS
GPW3125	GATCTTGTGTACAACTGTCG	ATCTATCTCTATCTCGCACG	60	295	4BS
gpw3127	TGTTAGCAGAATAGACCCACCC	CATCATCCTCAATGCCACAG	60	103	7AL
gpw3140	GGTGGAGAGAAAGATGGATACG	TCCTAAGAGAGATGCGGGC	60	215	7AS
gpw315	GATTTGGCCAGGTTTCATGT	TCATCGAGAGTGATTGCTGG	60		1DL
gpw3167	TAGGCTTTTGCCCGAAGAC	GTGGGTGTCATTTCCCCTC	60	125	2AS
gpw3183	ATCAGGCATCACCGCATT	GGAGTGAAGACAAGCTGTTGC	60	196	5BL
gpw3186	AGCATAGTGATTGATGTGACCG	ATACGGGAAAAAAACACCCC	60		6DS
gpw3190	TCACGGAGATAAAAAAGCGG	GATTCCAGCAGAGCACCTTT	60		1BS
gpw3191	GTCAAGGGGATCGGGGAG	GTCAAGGGGATCGGGGAG	60	182	5BL
gpw322	GCCCCAAAGGACCCATAAC	GATGTAAAATGCTAGGACCCG	60	170	3DS
GPW3224	AAGCTCAAAAGAGATTTGCATT	GGAAGTCCTTTCATCCCCTC	60	214	4AL
gpw3241	ATATAGGATTGGTGGGTCAACG	CAAATTCACATCCACTCCCC	60		6BL
gpw3249	CCTAGCTCGTCGTCTCGTG	AAAACAGCTACACATCCGCC	60	242
gpw3276	CGTGGATTTAGAAAAGACAT	ACCGTACATCCTTAATCAGA	60	229	7AL
gpw333	GAAGCACATCCTATCCTGACG	GACTAACCTCCATCATTTCCTC	60		3DS
GPW334	GGATGGACTGGGCAGGAAT	AGCACTGACTTTGCCTTAACT	60	184	7DL
gpw346	CGACCTTTCCCAATTCACAC	TGCTTTTATTCCATCGCACA	60	184	2DL
gpw360	CCTGCCCATATGATTGACCT	GGTCGGACACATACATGACG	60		1DL
gpw363	GTGTGTGGTTGGAGGGAACT	ATAAGAACATCGAGCGACCG	60		1BS
gpw4002	AGTACGACTCCATCAACCACG	GGGAAGCATGTCACCAATCT	60		1BL
gpw4032	GCACCCACAAGCAAAGAACT	CCAAGAAGGGACAATTAGCG	60		6BS
gpw4044	CCAAAACCTTGCTTCTCCCT	ACCATTGCCCCCTTTTCTAC	60		1AL
gpw4062	AAATAGAGGGGGGGTGAAGA	TGCACCCTGGATGATGAATA	60		6AL
gpw4069	GCTCCCTTTGCGTATCATGT	GCTCTTGCTCAGAAGCGAAT	60		1BS
gpw4074	CTCGCTGTTTTGTGAGTTGG	TGGATACATTTACACTCTCGCA	60	233	3DS
gpw4076	GTCTGTCCGGCGAGGTTC	AGGACTCCGGTGACGTGC	60	251	2AS
gpw4080	TTTTGATTGAGGTCCCTTCG	GTGGCACACAAGTAAGCTATGG	60	112
gpw4092	TGAAAATGATTGCACACTTGC	ATCCAAGCCTTTGTTTGCTG	60	244	3AL
gpw4100	AGCGACTTCTTAACTGTTAC	CTATCAAGGCGACTAGATT	60	275	7AL
gpw4101	TCCTAGATGGAGGTCTTGGC	TCCTCCTCCCCATTTTGAG	60	135	7BS
gpw4103	CTAGCCCAGTGTCAGGCTTC	GATGGAATGCAACCAGGC	60	287	2BL
gpw4108	ATGTGCAGTCCATCTATGTTGC	AGGGTGGGAAGGATGATAGG	60	218	2AS
gpw4111	GAAGCAGCGGTGATCTCG	ATATAGTGGGGGGAGGGTTG	60		1AL
GPW4117	GCACTGTCCTCTCCAAAAGC	AGTTTGCGACGATAAACGCT	60	244	4BS
GPW4120	TGCCCTTGGGAGATATTGAA	CATGTTTGGTTGGGACTGTAA	60	148	4BS
gpw4124	TGTGTGACAAGCGCCAGTTT	GTTCTGCTTGGAACTAGGATGG	60	211
gpw4145	GTCAGTCCGGGTTAGTTCCA	AGTGCGGTGAGCGAAGAC	60		6AS
gpw4169	GGATTGAGGCAACTCCGTC	TGCATGACTGCACATCAAAA	60		1AL
gpw4175	AGAGCGAATTCATTATGAAC	TTCCTATGGACACCTCTAC	60		6BS
GPW4189	TCTGAACCAATCGCCAGAGT	CTGTCGCTCTCTCTAACACACA	60	100	4DS
gpw4218	ATCAACGTACTCTCCACCCG	CATGGGCTCCGAGTTTTG	60	320	2BS
gpw4218	ATCAACGTACTCTCCACCCG	CATGGGCTCCGAGTTTTG	60	320	2BS
gpw4221	GGCCATCTAGGGTTAGGAGG	TGCACATTTTTACGAGTCCG	60	248	3AS
gpw4228	AGTTTCTTGCTGTGCTGGGT	CCACTGTTGGTTCCACGTC	60		236
GPW4251	CACGCCAAGTAGAGTCCCAT	GATGAATTGTGTGCTCGGG	60	220	4AS
gpw4257	CGTCCGAAGGCATTTTTCTA	AGATTACGTCGGGTGAAGAA	60		6AS
gpw4311	ATGAATCAGTAGATGGGTTGGG	CGCCACTAAACCTTCACACA	60		1AL
gpw4312	TGGATGACACTTATTCTCCCG	TGGAGTTGCTCACCTATTCTCA	60		6A CENTROMERE
gpw4313	ATCGGTAGGGAAGTTGGTCC	AGGAAGCCAAGGGAAAATGT	60		1BS
gpw4331	AACCATGAGCACGGATTCTC	AAAGATCGCACCTGCACTG	60		1AL
gpw4334	GACTCAGGTGCGATTTTGGT	ACAAATGGTCTTCGTGCTCC	60		1AL
gpw4344	CCTGCAAGGTTTCAATTCGT	TGAGGACCGTTGGTGTCAT	60		6A CENTROMERE
gpw4347	GAGGGTTAGGTGGGCCTTAG	AAGCACATTTTTGTGAGTCCG	60		6AS
gpw4357	CCCATCTGTTTGCTTAGTTTCC	GTACACCAGTGCCCAGTTAGC	60		6BS
GPW4358	ACTGTAGGGGAACGAACGTG	GACTTCACTTGATTGCTGTTCG	60	160	7DS
gpw4362	GGTGGTCTGACGGCAACTAT	GTGGTATCAAAAGCCCGAAA	60	358	5BL
gpw4373	GTAGCACCACAATCTCCGGT	AAAAAATCGGCAGTGAATGG	60		1AL
gpw4382	TGTTAGCAGAATAAGCTGGGTG	GTTGTTCAATGTTGTAGGTGCC	60	130	2BS
GPW4385	GGACTAATGGGGGCGTATG	TTGACGAGAGGGCAGGAG	60	135	7DL
gpw4401	CTAGGGAGGTTTGGGCCTG	TTTGGCCTATCTCTTTTGCTG	60	110	3AL
gpw4410	TTGAGGCGTGAAGATGAGC	ACAGGGCCAACAAATTCAGT	60		1AL
gpw4430	GCTTATCGCACTATCTGTAT	GTACAATCGCAGTAGTTCTC	60	400
gpw4444	CCTCCACCAGAGCCTGATTA	GTGTCACGGTTTCTCGGC	60	290	7BS
gpw4451	AGCTCCTCCAGGTCCAGC	TACAAACCTCCTCGCAGGG	60	145	3DL
gpw4457	GGTGGTTAGCCGACACATTT	GCAGATTGATTGCGTCTGG	60		250
gpw4466	GGTAGGTTCTCATAGACCGGC	TTTGGGGAGCTGCTACTGTC	60	393	3AL
gpw4467	CAAAACCACGAAAACTCGGT	GCACATTCCAGTCCCTTGTT	60	243	5DS
gpw4471	AATACACAGAGCACACAGGGG	TGTGCCGTCCTTATGAACAA	60	309	7BL
gpw4475	CTTATGCCACCCGCCTCT	TGAAAGGAGCTAGTTGGAAAGC	60	212	5DS
gpw4478	TCAATGATAAACATCCAGGTCG	TAAGTATTCGGGTATTGGCAGC	60		1BL
gpw4483	GCCGTGGTAGACAACTCTCTG	CGCATCTGTTGGATGGTTC	60	329	5BL
gpw4487	TACATACATTGAAGATTACACA	CCGGTGAAGTCTAGAGAA	60	166	2BL
gpw4503	TGATGAGCGACTGTTGGTTC	GAATTATGTGAGGGGTGAGAGC	60		1DL
GPW4538	AATTACGACCGGAGAGATA	CGTGTCTGGACCTGTAAC	60	136	4DL
GPW4545	TTGGGTCAGTGCTAGGGC	CTCCACTCCACTCCACTACTCC	60	146	4AS
gpw5016	TCACACGAAAATCAGAGCCC	CCTCCGCTCCTTCAACAGTA	60		3BL
gpw5023	TCCATTGCAGACGATGAGAG	TGGCAATACAAACACATGCA	60		6BL
gpw5032	AACACCCCCACATTATTTGC	CCTGTGCGGCCATTTAATAT	60		6AL
gpw5037	AGAGAGAGGTTGTACGGCC	GGCAAGAGGGGAATCCTAAG	60		6BL
GPW5054	CATTGTGTCCCACTTGACCA	AATTGCCAACTCAGCCATCT	60	375	7DL
gpw5058	CGATGCGTCCGTATTAGTGA	GGGTACACGGTGGAGTTCAT	60	389	7BL
GPW5072	GGGTCCGATCACATTCACTT	TGTTTGATTTGGTCTTCATTGC	60	138	4DS
gpw5076	GGATCTTGCCCTGTACCTACC	GTCGGAAAACAGTCACTAACCC	60		6BL
gpw5082	GCTCATCAGTTCGGTTATTCG	AAAAAATAGGTCGTTGCCTGG	60		1DL
gpw5104	ATCTGTCCGCCTACATCCAG	AACCATCCAACACACAAGCA	60	173	3DS
gpw5126	TGCTAATCACATAATGACACGC	GTTGTGAGGGTGATGTCGC	60		1DL
gpw5129	GGTGAATGTTGTAGTGGACAGA	GCATAGTCTCCGCATTTGGT	60	153	5DL
gpw5130	CTGAGGAAGACGTGAGAATCG	AGGTGGTTACATGGACTTGAGC	60		6BL
gpw5155	TGAGAGCTTCAAGTTCCA	TGTCCTACTTGTCTTCCTG	60	380
gpw5162	TGCTAATCACATAATGACACGC	GTTGTGAGGGTGATGTCGC	60		1BL
gpw5166	TTTCACTAGCAATGAGGGGG	TACACGTTGGAGTCTCGGTG	60		3DS
gpw5175	CGGGACTCTGATGGTGATG	TCAGCGATCAATAAAGCCG	60	364	3AL
gpw5176	CACTCCCTATTCCAGAAACTGC	GGCGATGAGGTCCTGTATGT	60		6DS
gpw5180	ACGTAAGTCCATCTGCCCC	ATTGAAGTGACGCCTGCC	60	129	7AL
GPW5185	TAATGCCGAAAAAGATTCGC	GCTCATTCCTTGGTTGCG	60	137	4DL
gpw5188	TTTTCTGGTGTCTTTTGCTGG	GATTTGTTGATGCGTGCG	60		1AL
gpw5189	GATCAAGCGCATTTTTGTGA	GGGCTAGGGTTAAGGGATTG	60	228	5DS
gpw5193	AATTAGAGGGGTGAAAGGCTG	CCAAGGACTACATCAGAAACCC	60		1A
GPW5208	TGAGGAACAGCGTAGACGG	TGCGGAATCTTGTCTTACACC	60	394	7DS
gpw5210	CAGCGGACCTAAGCATCATA	CGCTAAAGATGAAGTGAAGACA	60		6AL
GPW5211	AAGTCACCATAAAGAACCACCC	ACAATGTTGCTATTGTGGCG	60	170	7DS
gpw5212	GAGATAACGCTGAAATCGTCG	AGTCACACACAAAAACAGCAGC	60		6BS
gpw5235	TTTCACAGACGAAGCCCTG	CAACCTAAAAACTCCTTGCCC	60	307	3DL
gpw5237	AGGAACAAGCGACCAAACC	CACGACTCCCCCACTTTG	60	251	2DL
gpw5239	CGGATGAATAACCAACCCTG	CCACTTGTTGACATTCCAAGG	60	354	2DL
gpw5248	TAGGAGCCATAGCCAATTTCC	GAAGAACACTTTCGTCCTCACA	60	242	3DS
gpw5255	AAACAACACCCTTGGCTCAC	GTACACGACAATCCGAAAAGTG	60	229	4DL
gpw5260	CCCTCTTCACTTCGCTTCAC	TGCCTTCTTCATCGCCTC	60		1DS
gpw5262	TCAGGTTTGGGAGCAAGAAC	TTCCTTCAGCCCACTTCATC	60	100	2BS
gpw5271	ATACATACCCAATGCAGAAGCA	GAAGGAACGAATCAGGAAACA	60	248	3AL
GPW5314	CTGTGATTCCTTAGGATTGT	CAGTTCTCCATATAGTGTGC	60	341	4DL
gpw7006	TGAATTGCAGGAGTGGCG	CAAACAAGGAGACGGTGAGG	60		1AS
gpw7011	CCGCTCTAGGGTTTCGTCTC	CAGTCGTCCTCGATCATGTG	60		6BS
GPW7026	AGAAGGAAGGCAAGGGCTAC	CCACGCAAGCACATTACATT	60		4BS
gpw7052	ATTCGGCACCAGCATCTACT	GGTTTCGTACAACGGCACAT	60		1AS
gpw7053	AATTCGGCACCAGAGAGAGC	GAGAAGGCGACGGAGGAGAT	60		3DS
gpw7070	CCAATGACCTGATTTCCTCC	CATCGTGCATTCCATCATCA	60		1AS
gpw7079	AGCTGGTGCCATTGTGTTGT	CCTGGCCTGATGGATATTGT	60		6DS
gpw7082	AGGTACGGAGTGCAATGGAA	CCCAACAGTCAGGTCAAGGT	60		1DS
gpw7093	TTCCCCGTAATCAAGCTCC	CGGCTCACTGCTCACCTACT	60		1BS
gpw7101	CCTGGTATGTATGGTAGAGCCC	ACCGCAGTGGCTGAAATC	60	145	2AS
gpw7107	GAGAACCTCTACGGAGGCG	CACTTTGGTCATCCCAGCTT	60	367	5DL
gpw7109	ATTCGACAACTTCGGGGAG	TGCAACGCAAACACTACACA	60		1DS
gpw7148	GCACACAACGACACTTGCTT	GCTTAGCTGCTTGCTTTGTG	60	101	3DL
gpw7180	TAATTGCAAGGAGGATGTCG	ATGAACAATTCGCCACTCAG	60	192	5BS
gpw7185	AGTGCTCGCTGGTTCATGC	GCAGCACACATCAGTGAAGC	60	212	7AS
gpw7213	GAGACCACCTTCGCGCC	CGACGAGCCTGACAAGATTC	60	151	3AL
gpw7218	CTAACTGTGATTGCTCCGCA	CGGCATTCCTTTTATTTACTCG	60	147	5AS
gpw7220	CTTTACGGATTTCGAGGCAG	AGATGGAAGCATGCGGTAAC	60	187	3BL
GPW7253	CGTCATCTACGGCTGATCCA	AACATCTCTGCCTGCATGCT	60	162	4AL
gpw7258	TCCCAGAACTTCGATGACG	GGTGAGGACGCTTCAAACTC	60		1AL
gpw7262	GCTGCAACCCAAGATGAGAT	GCAGTGGCTCGGCTAAAG	60		6BL
gpw7285	TATACCAGTACGGAGCTGAACG	CTGCTCTGGACCGCAACT	60	292	2DL
gpw7288	ACAATTCACAAGATTGGCTGC	TAGGCCGGATGCACTAGACT	60	106	7AS
gpw7292	TGCAAGGAGACCGACTTATCAC	CTTACCTGCTACGAGCGCTG	60		6BS
gpw7296	GACGGTGATCCAGTTGCC	TCAGGTCGTTCAGGGCTC	60		1DL
gpw7303	TGCTGTAGATGGCTGTTTCG	GCTTTTGCTGACACTTGGAA	60		6BL
gpw7321	TGAGACCATCTCTTGCTCCA	TCACAGTCGCTGCATAAAGG	60	165	3DS
gpw7325	GTGGCATAGCAACTGCACC	CACCTCCAGCGCCATTAC	60	123
gpw7335	CCATCGCTACCAACCACC	CGAGCATGAGCACAATGAAT	60	250	3BL
gpw7342	GCGGTGGCAACAACCTAC	GTGCATAAAGAGGGCAGAGC	60	220	7BS
gpw7388	GAGGACTCCGATGCCGAC	AAGGATCGGGCCAAGAAC	60		6AL
gpw7399	TACATCTCTTCATCTCATCGGC	CAGCAACAATTCCCCCAG	60	178	2AS
GPW7414	ACTGAACCAAGCAGCAGGAT	CTTCTCTCCTCACGTCCCTG	60	222	4DL
gpw7422	ATCGACACCAAACGCCTCT	TGCTTGTGCGAGTAAAGTGG	60		1BS
gpw7443	GCAGGGCTACTCATACTCGC	TCTCCCAGGTGGTGGTACAT	60		1BL
gpw7452	ACAGCTTGATGCTACTTTGCC	CGCGGATGAACGTCAATG	60	123	3BS
gpw7467	GCATCAGCAACAACAGCAAT	GATCAATTCCAGAAAGCCCA	60	290	3DL
gpw7506	CGCTCAAGTCCATCCACC	GAACTCAAAAGTGGGGAAAGA	60	329	2BL
gpw7574	CCGATTGCTACACCGAAGTT	TGTTTGCATTCTCACAGGTAGC	60	207	5BL
gpw7592	CAAGACAAGGACAGCAACGA	TCAGGCGCTTTTGAAGATG	60		6AS
gpw7596	AGCTCTATGCGGCCATTG	TGGAAACAAACTACTAGGGAGG	60	116	7BL
gpw7603	GGACCGGGGGATGAAGAC	CCTACACGCTGTTCCACCAC	60		1BL
gpw7607	ACAAGAACGACGACCAGGAT	CTTAAACTAAAGAACGGGAGCA	60	131	5AS
gpw7641	GGATGAATGCTGTTGTGTCG	GCTGTGGTACTGCTCCCAAT	60	137	2BS
gpw7641	GGATGAATGCTGTTGTGTCG	GCTGTGGTACTGCTCCCAAT	60	137	2BS
GPW7683	ACACTCCTTCACCACACTTCG	CTCCTTGAGGCTCCTGCTC	60	177	7DL
gpw7739	TCGATACGGTTCTTGCACTG	TTCATAAGCATGGTCCCTCC	60		6BS
gpw7805	CAGCATGTGCATCACCGT	CCTCCGCAGGTCAAGCTC	60	172	3BL
gpw7812	ACTGTCCTCGATTGTGTGTCC	CTTTATCAGGCATGGAACTGC	60		1BL
gpw8020	TTTGCGATGTTTATTGTATGCC	TTGAGTAGTAGCCAACCAGCC	60	336	3BS
gpw8034	CCTTCCTTACTGCCTCCCTC	ACAAGATCACCGAGAAGATGG	60	275
gpw8055	GCCCAGAACTCCTCCTTCTC	TTTGCTAGGGAGCATCCG	60		1AL
gpw8068	ATCTGGAGTGGTGTAATTGCG	ATCCATCGAACTAGGCAACG	60		6AL
gpw8090	GAGTTCGTGAAGTTGGGAGC	TAGCCCATTTTTATGTCGTCG	60	361	7BL
gpw8100	GCCATTCTATCTGTGTTCTT	ATGCATGATTGGTTCTACTA	60	392	3BS
gpw8250	AAAAAACGTGCATTCGCC	GGACTCCATGTCCGGGTC	60		1BS
gpw8289	GGGGTGAGTTGGCACTAAAA	AGTATGGAAGCATTGACGGC	60	300	7AS
gwm212M-13-40	TTTCCCAGTCACGACGTTAAGCAACATTTGCTGCAATG	TGCAGTTAACTTGTTGAAAGGA	60		5DL
gwm 319M-13-40	TTTCCCAGTCACGACGTTGGTTGCTGTACAAGTGTTCACG	CGGGTGCTGTGTGTAATGAC	55		2B
gwm 319M-13-40	TTTCCCAGTCACGACGTTGGTTGCTGTACAAGTGTTCACG	CGGGTGCTGTGTGTAATGAC	55		2B
GWM108-M13F-20	TGTAAAACGACGGCCAGTCGA CAA TGG GGT CTT AGC AT	TGC ACA CTT AAA TTA CAT CCG C	60	135/137	3BL
gwm11	GGATAGTCAGACAATTCTTGTG	GTGAATTGTGTCTTGTATGCTTCC	50	202-213	1BS
gwm135	TGTCAACATCGTTTTGAAAAGG	ACACTGTCAACCTGGCAATG	60	153-176	1AL
GWM136	GACAGCACCTTGCCCTTTG	CATCGGCAACATGCTCATC		60	1AS
GWM136-M13F-20	TGTAAAACGACGGCCAGTGAC AGC ACC TTG CCC TTT G	CAT CGG CAA CAT GCT CAT C	60	278/321	1AS
gwm146	CCAAAAAAACTGCCTGCATG	CTCTGGCATTGCTCCTTGG	60	174	7BL
gwm148	GTGAGGCAGCAAGAGAGAAA	CAAAGCTTGACTCAGACCAAA	60		2BS
gwm148	GTGAGGCAGCAAGAGAGAAA	CAAAGCTTGACTCAGACCAAA	60		2BS
gwm157	GTCGTCGCGGTAAGCTTG	GAGTGAACACACGAGGCTTG	Tm 60°	104-106-110	2DS
gwm160	TTCAATTCAGTCTTGGCTTGG	CTGCAGGAAAAAAAGTACACCC	60	184-196	4AL
gwm161	GATCGAGTGATGGCAGATGG	TGTGAATTACTTGGACGTGG	60	145-154	3DS
gwm164	ACATTTCTCCCCCATCGTC	TTGTAAACAAATCGCATGCG	55	122-128	1AL
gwm169M-13-40	TTTCCCAGTCACGACGTTACCACTGCAGAGAACACATACG	GTGCTCTGCTCTAAGTGTGGG	60	193-220	6AL
gwm182	TGATGTAGTGAGCCCATAGGC	TTGCACACAGCCAAATAAGG	60	163-187	5DL
GWM186-M13F-20	TGTAAAACGACGGCCAGTGCAGAGCCTGGTTCAAAAAG	CGCCTCTAGCGAGAGCTATG5'	60	132/106	5AL
gwm190	GTGCTTGCTGAGCTATGAGTC	GTGCCACGTGGTACCTTTG	60	201-253	5DS
gwm193	CTTTGTGCACCTCTCTCTCC	AATTGTGTTGATGATTTGGGG	60	171-182	6BS
GWM194-M13F-20	TGTAAAACGACGGCCAGTGATCTGCTCTACTCTCCTCC	CGACGCAGAACTTAAACAAG	50	136/131	4DL
GWM219-M13F-20	TGTAAAACGACGGCCAGTGATGAGCGACACCTAGCCTC	GGGGTCCGAGTCCACAAC	60	184/153	6BL
gwm232	ATCTCAACGGCAAGCCG	CTGATGCAAGCAATCCACC	55		1DL
gwm261M-13-40	TTTCCCAGTCACGACGTTCTCCCTGTACGCCTAAGGC	CTCGCGCTACTAGCCATTG	55	164-194	2DS,Rht8
gwm271	CAAGATCGTGGAGCCAGC	AGCTGCTAGCTTTTGGGACA	60		5DL
gwm272	TGCTCTTTGGCGAATATATGG	GTTCAAAACAAATTAAAAGGCCC	50	140	5DL
gwm274	AACTTGCAAAACTGTTCTGA	TATTTGAAGCGGTTTGATTT	50	154-177-184	7BS
gwm276	ATTTGCCTGAAGAAAATATT	AATTTCACTGCATACACAAG	55	109	7AL
GWM285-M13F-20	TGTAAAACGACGGCCAGTATGACCCTTCTGCCAAACAC	ATCGACCGGGATCTAGCC	60	222/227	3BL
GWM291-M13F-20	TGTAAAACGACGGCCAGTCATCCCTACGCCACTCTGC	AATGGTATCTATTCCGACCCG	60	160/158	5AL
GWM292-M13F-20	TGTAAAACGACGGCCAGTTCACCGTGGTCACCGAC	CCACCGAGCCGATAATGTAC	60	214/188	5DL
gwm294	GGATTGGAGTTAAGAGAGAACCG	GCAGAGTGATCAATGCCAGA	55		2AS
gwm295M-13-40	TTTCCCAGTCACGACGTTGTGAAGCAGACCCACAACAC	GACGGCTGCGACGTAGAG	60	254-258	7D, Yr18
GWM299-M13F-20	TGTAAAACGACGGCCAGTACTACTTAGGCCTCCCGCC	TGACCCACTTGCAATTCATC	55	206/215	3BL
gwm304	AGGAAACAGAAATATCGCGG	AGGACTGTGGGGAATGAATG	55	202-208	5AL
gwm312	ATCGCATGATGCACGTAGAG	ACATGCATGCCTACCTAATGG	60		2AS
GWM320-M13F-20	TGTAAAACGACGGCCAGTCGAGATACTATGGAAGGTGAGG	ATCTTTGCAAGGATTGCCC	55	/226	2D
GWM325-M13F-20	TGTAAAACGACGGCCAGTTTTCTTCTGTCGTTCTCTTCCC	TTTTTACGCGTCAACGACG	60	133/138	6D
GWM332-M13F-20	TGTAAAACGACGGCCAGTAGCCAGCAAGTCACCAAAAC	AGTGCTGGAAAGAGTAGTGAAGC	60	290/211	7AL
gwm333	GCCCGGTCATGTAAAACG	TTTCAGTTTGCGTTAAGCTTTG	55	154-166	7BL
gwm334	AATTTCAAAAAGGAGAGAGA	AACATGTGTTTTTAGCTATC	50	114	6AS
gwm337	CCTCTTCCTCCCTCACTTAGC	TGCTAACTGGCCTTTGCC	55	191-182	1DS
GWM341-M13F-20	TGTAAAACGACGGCCAGTTTCAGTGGTAGCGGTCGAG	CCGACATCTCATGGATCCAC	55	166/157	3DS
gwm356	AGCGTTCTTGGGAATTAGAGA	CCAATCAGCCTGCAACAAC	55		2AL
gwm357	TATGGTCAAAGTTGGACCTCG	AGGCTGCAGCTCTTCTTCAG	55	120-123	1AL
gwm371	GACCAAGATATTCAAACTGGCC	AGCTCAGCTTGCTTGGTACC	60	176-191	5BL
GWM372-M13F-20	TGTAAAACGACGGCCAGTAATAGAGCCCTGGGACTGGG	GAAGGACGACATTCCACCTG	60	310/309	2AS
gwm388	CTACAATTCGAAGGAGAGGGG	CACCGCGTCAACTACTTAAGC	60		2BL
gwm389	ATCATGTCGATCTCCTTGACG	TGCCATGCACATTAGCAGAT	Tm 60°	117-128	3BS
gwm397M-13-40	TTTCCCAGTCACGACGTTTGTCATGGATTATTTGGTCGG	CTGCACTCTCGGTATACCAGC	55	175-193	4AS
gwm400	GTGCTGCCACCACTTGC	TGTAGGCACTGCTTGGGAG	60	143-150	7BS
GWM408-M13F-20	TGTAAAACGACGGCCAGTTCGATTTATTTGGGCCACTG	GTATAATTCGTTCACAGCACGC	55	182/148	5BL
gwm413M-13-40	TTTCCCAGTCACGACGTTTGCTTGTCTAGATTGCTTGGG	GATCGTCTCGTCCTTGGCA	60	91-95	1B,1A,Yr15
GWM427-M13F-20	TGTAAAACGACGGCCAGTAAACTTAGAACTGTAATTTCAGA	AGTGTGTTCATTTGACAGTT	50	195/184	6AL
gwm428	CGAGGCAGCGAGGATTT	TTCTCCACTAGCCCCGC	60	133-137	7DL
gwm429	TTGTACATTAAGTTCCCATTA	TTTAAGGACCTACATGACAC	50		2BS
GWM46-M13F-20	TGTAAAACGACGGCCAGTGCACGTGAATGGATTGGAC	TGACCCAATAGTGGTGGTCA	60	186/179	7BS
gwm471	CGGCCCTATCATGGCTG	GCTTGCAAGTTCCATTTTGC	60	130	7AS
GWM484-M13F-20	TGTAAAACGACGGCCAGTACATCGCTCTTCACAAACCC	AGTTCCGGTCATGGCTAGG	55	153/143	2D
GWM493-M13F-20	TGTAAAACGACGGCCAGTTTCCCATAACTAAAACCGCG	GGAACATCATTTCTGGACTTTG	60	179/171	3BS
GWM495-M13F-20	TGTAAAACGACGGCCAGTGAGAGCCTCGCGAAATATAGG	TGCTTCTGGTGTTCCTTCG	60	160/178	4BS
gwm497	GTAGTGAAGACAAGGGCATT	CCGAAAGTTGGGTGATATAC	55	103-137	1AL
gwm497	GTAGTGAAGACAAGGGCATT	CCGAAAGTTGGGTGATATAC	Tm 55°	103-137-147	1A-2A-3A-5B-3D
gwm497	GTAGTGAAGACAAGGGCATT	CCGAAAGTTGGGTGATATAC	55	103-137-147	1A-5B-2A-3D-3A
gwm498	GGTGGTATGGACTATGGACACT	TTTGCATGGAGGCACATACT	55	159-161	1A-1B
gwm518	AATCACAACAAGGCGTGACA	CAGGGTGGTGCATGCAT	55	154-166	6BS
GWM537-M13F-20	TGTAAAACGACGGCCAGTACATAATGCTTCCTGTGCACC	GCCACTTTTGTGTCGTTCCT	60	207/203	7BL
gwm539	CTGCTCTAAGATTCATGCAACC	GAGGCTTGTGCCCTCTGTAG	Tm 60°	139-143-157	2DL
gwm554	TGCCCACAACGGAACTTG	GCAACCACCAAGCACAAAGT	60	164-148	5BL
GWM570-M13F-20	TGTAAAACGACGGCCAGTTCGCCTTTTACAGTCGGC	ATGGGTAGCTGAGAGCCAAA	60	149/143	6A CENTROMERE
gwm577M-13-40	TTTCCCAGTCACGACGTTATGGCATAATTTGGTGAAATTG	TGTTTCAAGCCCAACTTCTATT	55	155-163	7BL
GWM595-M13F-20	TGTAAAACGACGGCCAGTGCATAGCATCGCATATGCAT	GCCACGCTTGGACAAGATAT	60	/146	5AL
GWM5-M13F-20	TGTAAAACGACGGCCAGTGCCAGCTACCTCGATACAACTC	AGAAAGGGCCAGGCTAGTAGT	50	171/158	3A
GWM610-M13F-20	TGTAAAACGACGGCCAGTCTGCCTTCTCCATGGTTTGT	AATGGCCAAAGGTTATGAAGG		172/162	4AS
gwm630	GTGCCTGTGCCATCGTC	CGAAAGTAACAGCGCAGTGA	60		2BS
gwm630	GTGCCTGTGCCATCGTC	CGAAAGTAACAGCGCAGTGA	60		2BS
GWM636-M13F-20	TGTAAAACGACGGCCAGTCGGTAGTTTTTAGCAAAGAG	CCTTACAGTTCTTGGCAGAA	50	112/84	2AS
gwm642	ACGGCGAGAAGGTGCTC	CATGAAAGGCAAGTTCGTCA	60	179-187	1DL
GWM6-M13F-20	TGTAAAACGACGGCCAGTCGTATCACCTCCTAGCTAAACTAG	AGCCTTATCATGACCCTACCTT	55	207/196	4BS
gwm95	GATCAAACACACACCCCTCC	AATGCAAAGTGAAAAACCCG	60		2AS
Sr39M-13-40	TTTCCCAGTCACGACGTTAGA GAG AGT AGA AGA GCT GC	AGA GAG AGA GCA TCC ACC	60	900	2B
Sr39M-13-40	TTTCCCAGTCACGACGTTAGA GAG AGT AGA AGA GCT GC	AGA GAG AGA GCA TCC ACC	60	900	2B
SWM10M-13-40	TTTCCCAGTCACGACGTTGCC TAC TTTGAC GGC ATATGG	CCATCTTGACATACTTTGGCCTTCC	68	150	7DS
TaglgapM-13-40	TTTCCCAGTCACGACGTTGCAGACCTGTGTCATTGGTC	GATATAGTGGCAGCAGGATACG	60	214-283	1BS
wmc10	GATCCGTTCTGAGGTGAGTT	GGCAGCACCCTCTATTGTCT	61	267	7BL
wmc104	TcTcccTcATTAgAgTTgTccA	ATgcAAgTTTAgAgcAAcAccA	66		6BS
wmc105	AATgTcATgcgTgTAgTAgccA	AAgcgcAcTTAAcAgAAgAggg	66		6BL
wmc11	TTGTGATCCTGGTTGTGTTGTGA	CACCCAGCCGTTATATATGTTGA	61	177	3AS
wmc110	GCAGATGAGTTGAGTTGGATTG	GTACTTGGAAACTGTGTTTGGG	61	170	5AL
wmc125	ATACCACCATGCATGTGGAAGT	ACCGCTTGTCATTTCCTTCTGT	61	251	4BS
wmc128	CGGACAGCTACTGCTCTCCTTA	CTGTTGCTTGCTCTGCACCCTT	61	199	1B
wmc144	GGACACCAATCCAACATGAACA	AAGGATAGTTGGGTGGTGCTGA	Tm 61°	143	2DS
wmc147	AgAAcgAAAgAAgcgcgcTgAg	ATgTgTTTcTTATccTgcgggc	66		1DS
wmc153	ATGAGGACTCGAAGCTTGGC	CTGAGCTTTTGCGCGTTGAG	Tm 61°	177	3AS
WMC154-M13F-20	TGTAAAACGACGGCCAGTATGCTCGTCAGTGTCATGTTTG	AAACGGAACCTACCTCACTCTT	61	199	2BS
WMC154-M13F-20	TGTAAAACGACGGCCAGTATGCTCGTCAGTGTCATGTTTG	AAACGGAACCTACCTCACTCTT	61	199	2BS
wmc156	gccTcTAgggAgAAAAcTAAcA	TcAAgATcATATccTccccAAc	56		1BS
wmc160	CATGGCTCCAAGATACAAAAAG	AGGCCTGGATTCATGATAGATA	51	169	5BL
wmc173	TgcAgTTgcggATccTTgA	TAAccAAgcAgcAcgTATT	56		1DL
WMC177-M13F-20	TGTAAAACGACGGCCAGTAGGGCTCTCTTTAATTCTTGCT	GGTCTATCGTAATCCACCTGTA	51	184	2AS
wmc18	CTGGGGCTTGGATCACGTCATT	AGCCATGGACATGGTGTCCTTC	Tm 61°	230	2DS
WMC183	cAgAAAcggcTcAAcTTAAcAA	TcTgATcTcgTgATcAgAATAg	51	224	1AL
WMC201-M13F-20	TGTAAAACGACGGCCAGTCATGCTCTTTCACTTGGGTTCG	GCGCTTGCAGGAATTCAACACT	61	249	6AL
WMC219-M13F-20	TGTAAAACGACGGCCAGTTGCTAGTTTGTCATCCGGGCGA	CAATCCCGTTCTACAAGTTCCA		204	4AL
wmc231	CATGGCGAGGAGCTCGGTGGTC	GTGGAGCACAGGCGGAGCAAGG	Tm 61°	229	3BS
wmc233	GACGTCAAGAATCTTCGTCGGA	ATCTGCTGAGCAGATCGTGGTT	61	260	5DS
wmc24	GTGAGCAATTTTGATTATACTG	TACCCTGATGCTGTAATATGTG	51	152	1AS
wmc25	TCTGGCCAGGATCAATATTACT	TAAGATACATAGATCCAACACC	51	166	2BS
wmc25	TCTGGCCAGGATCAATATTACT	TAAGATACATAGATCCAACACC	51	166	2BS
wmc25	TCTGGCCAGGATCAATATTACT	TAAGATACATAGATCCAACACC	51	166	2B/2D
wmc254	AGTAATCTGGTCCTCTCTTCTTCT	AGGTAATCTCCGAGTGCACTTCAT	51	193	1A-4B-6A
WMC256-M13F-20	TGTAAAACGACGGCCAGTCCAAATCTTCGAACAAGAACCC	ACCGATCGATGGTGTATACTGA	61	117	6AL
WMC262-M13F-20	TGTAAAACGACGGCCAGTGCTTTAACAAAGATCCAAGTGGCAT	GTAAACATCCAAACAAAGTCGAACG		198	4AL
wmc278	AAACGATAGTAAAATTACCTCGGAT	TCAAAAAATAGCAACTTGAAGACAT	51	165	1AL
wmc283	CGTTGGCTGGGTTATATCATCT	GACCCGCGTGTAAGTGATAGGA	61	151	4AL
wmc285	TGTGGTTGTATTTGCGGTATGG	TTGTGGTGCTGAGTTAGCTTGT	61	289	4DS
wmc296	GAATCTCATCTTCCCTTGCCAC	ATGGAGGGGTATAAAGACAGCG	61	155	2AS
wmc307	GTTTGAAGACCAAGCTCCTCCT	ACCATAACCTCTCAAGAACCCA	Tm 61°	145	3BL
WMC311-M13F-20	TGTAAAACGACGGCCAGTGGGCCTGCATTTCTCCTTTCTT	CTGAACTTGCTAGACGTTCCGA	66/63	108	7BL
wmc312	TGTGCCCGCTGGTGCGAAG	CCGACGCAGGTGAGCGAAG	61	227	1AL
wmc313	GCAGTCTAATTATCTGCTGGCG	GGGTCCTTGTCTACTCATGTCT	51	197	4AL
WMC327-M13F-20	TGTAAAACGACGGCCAGTTGCGGTACAGGCAAGGCT	TAGAACGCCCTCGTCGGA	61	183	5AL
wmc329	AcAAAggTgcATTcgTAgA	AAcAcgcATcAgTTTcAgT	56		1DS
wmc331	CCTGTTGCATACTTGACCTTTTT	GGAGTTCAATCTTTCATCACCAT	61	128	4DL
wmc332	CATTTACAAAGCGCATGAAGCC	GAAAACTTTGGGAACAAGAGCA	61	169	2BL
wmc336	GTCTTACCCCGCGATCTGC	GCGGCCTGAGCTTCTTGAG	61	113	1AS
wmc349	ACACACACTCGATCGCAC	GCAGTTGATCATCAAAACACA	51	94	4BS
wmc357	TAGTGGGTGACCGGTCAAGA	TGGACGGATTTGGTCATTTC	61	204	5DL
wmc364	ATcAcAATgcTggcccTAAAAc	cAgTgccAAAATgTcgAAAgTc	64	223	7BS
wmc36M-13-40	TTTCCCAGTCACGACGTTTTcTcTTTTccTTTcgcAcTcc	cATcAgTTgTggggTTTcTTcA	62	161	1DL
wmc376	TCTCAACCACCGACTTGTAA	ACATGTAATTGGGGACACTG	51	222	5BL
wmc382	CATGAATGGAGGCACTGAAACA	CCTTCCGGTCGACGCAAC	61	217	2AS
WMC396-M13F-20	TGTAAAACGACGGCCAGTTGCACTGTTTTACCTTCACGGA	CAAAGCAAGAACCAGAGCCACT	61	146	7BL
wmc406M-13-40	TTTCCCAGTCACGACGTTTATgAgggTcggATcAATAcAA	cgAgTTTAcTgcAAAcAAATgg	61	217	1BS
WMC407-M13F-20	TGTAAAACGACGGCCAGTGGTAATTCTAGGCTGACATATGCTC	CATATTTCCAAATCCCCAACTC	61	136/138	2AS
wmc413	CACTGGAAACATCTCTTCAACT	ACAGGAAAGGATGATGTTCTCT	51	162	4BS
wmc416	AGCCCTTTCTACCGTGTTTCTT	TATGGTCGATGGACTGTCCCTA	61	220	1BL
WMC429-M13F-20	TGTAAAACGACGGCCAGTCGTAAAGATTTTCATTTGGCG	AACGGCAGCTTGAAAACATAG	61	225	1DL
wmc432	ATGACACCAGATCTAGCAC	AATATTGGCATGATTACACA	51	189	1DS
wmc438	GACCGTTGGGCTGTATAGCATT	CTCTGACAGTGGTGGAGCTTGA	61	256	7DL
wmc445	AGAATAGGTTCTTGGGCCAGTC	GAGATGATCTCCTCCATCAGCA	61	229	5AL
WMC44-M13F-20	TGTAAAACGACGGCCAGTGGTCTTCTGGGCTTTGATCCTG	TGTTGCTAGGGACCCGTAGTGG		242	1BL
wmc457	CTTCCATGAATCAAAGCAGCAC	CATCCATGGCAGAAACAATAGC	61	159	4DL
WMC463-M13F-20	TGTAAAACGACGGCCAGTGATTGTATAGTCGGTTACCCCT	ATTAGTGCCCTCCATAATTGTG	51	115,152/156	7DS
wmc468	AGCTGGGTTAATAACAGAGGAT	CACATAACTGTCCACTCCTTTC	51	150	4AL
wmc468	AGCTGGGTTAATAACAGAGGAT	CACATAACTGTCCACTCCTTTC	51	150	4AL
wmc469	AGGTGGCTGCCAACG	CAATTTTATCAGATGCCCGA	51	148	1A-6D
WMC476-M13F-20	TGTAAAACGACGGCCAGTTACCAACCACACCTGCGAGT	CTAGATGAACCTTCGTGCGG	61	200	7BS
WMC477-M13F-20	TGTAAAACGACGGCCAGTCGTCGAAAACCGTACACTCTCC	GCGAAACAGAATAGCCCTGATG	61	167	2BL
wmc487	CAAATTTGGCCACCATTTTACA	CGGTTCAATCCTTGGATTTACA	51	160	6BS
WMC494-M13F-20	TGTAAAACGACGGCCAGTGGATCGAGTCTCAAGTCTACAA	AGAAGGAACAAGCAACATCATA	51	160/220	6B
WMC503-M13F-20	TGTAAAACGACGGCCAGTGCAATAGTTCCCGCAAGAAAAG	ATCAACTACCTCCAGATCCCGT	61	237	2D
wmc506	CACTTCCTCAACATGCCAGA	CTTTCAATGTGGAAGGCGAC	61	216	7DS
wmc508	AGCCCTTGAGTTGGTCTCATTT	GAGCAGAGCTCCACTCACATTT	61	179	5BL
WMC517-M13F-20	TGTAAAACGACGGCCAGTATCCTGACGTTACACGCACC	ACCTGGAACACCACGACAAA	61	180/200	7BL
wmc52	TccAATcAATcAgggAggAgTA	gAAcgcATcAAggcATgAAgTA	66		1BL
WMC522-M13F-20	TGTAAAACGACGGCCAGTAAAAATCTCACGAGTCGGGC	CCCGAGCAGGAGCTACAAAT	61	180/200	2AS
wmc524	TAGTCCACCGGACGGAAAGTAT	GTACCACCGATTGATGCTTGAG	61	198	5AL
WMC525-M13F-20	TGTAAAACGACGGCCAGTGTTTGACGTGTTTGCTGCTTAC	CTACGGATAATGATTGCTGGCT	61	200/220(stuttery)	7AL
WMC532-M13F-20	TGTAAAACGACGGCCAGTGATACATCAAGATCGTGCCAAA	GGGAGAAATCATTAACGAAGGG	61	160/180	3A
WMC537-M13F-20	TGTAAAACGACGGCCAGTTCTTCTGTACATTGAACAACGA	ATGCAGAACCGTGATAGGAT	51	98/106,176/184	5BL
wmc552	ACTAAGGAGTGTGAGGGCTGTG	CTCTCGCGCTATAAAAGAAGGA	61	149	3DL
wmc553	CGGAGCATGCAGCTAGTAA	CGCCTGCAGAATTCAACAC	60	356	6AS
WMC559-M13F-20	TGTAAAACGACGGCCAGTACACCACGAATGATGTGCCA	ACGACGCCATGTATGCAGAA	61	338	3A
wmc593	GGGGAGAAGCAGCAGGG	CGCGCGGTTGCCGGTGG	61	127	7AS
wmc594	CCCCTCACTGCCG	ATATCCATATAGTACTCGCAC	Tm 51°	178	3AL
wmc603	ACAAACGGTGACAATGCAAGGA	CGCCTCTCTCGTAAGCCTCAAC	61	120	7AS
WMC622-M13F-20	TGTAAAACGACGGCCAGTCAGGAAGAAGAGCTCCGAGAAA	CTTGCTAACCCGCGCC	61	139	4DL
wmc656	AAGTAGGCGAGCGTTGT	TTTCCCTGGCGAGATG	61	154	3DL
wmc658	CTCATCGTCCTCCTCCACTTTG	GCCATCCGTTGACTTGAGGTTA	61	201	2AL
wmc667	GAGGAGAGGAAAAGGCAGGCTA	AACTCTTGCGTGTCTCAAACCG	61	131	2AS
WMC671-M13F-20	TGTAAAACGACGGCCAGTGTACGTCAAAGAAAGAGAATTACCTC	CTCAGAGATATATCTTCGTTGTCAGT	61	106	7DL
wmc696	AGTGGAGCCATGGTACTGATTT	TGTGTACTATTCCCGTCGGTCT	61	130	7BS
wmc7	TTTCCCAGTCACGACGTTgcTTggAcTAgcTAgAgTATcAT	AcAATcTTcAATTcTgTcgcAcg	51	203	3BS
wmc707	GCTAGCTGACACTTTTCCTTTG	TCAGTTTCCCACTCACTTCTTT	61	192	4AL
WMC710-M13F-20	TGTAAAACGACGGCCAGTGTAAGAAGGCAGCACGTATGAA	TAAGCATTCCCAATCACTCTCA	51	126	4BL
wmc713	ACATAGCATCCCATACTGAGAGAGG	ATGCGGGGAATAGAGACACAC	61	145	5AL
WMC716	CATTTATGTGCACGCCGAAG	CCATAAGCATCGTCACCCTG	61	179	1AL
WMC716-M13F-20	TGTAAAACGACGGCCAGTCATTTATGTGCACGCCGAAG	CCATAAGCATCGTCACCCTG	61	179	1AL
WMC720-M13F-20	TGTAAAACGACGGCCAGTCACCATGGTTGGCAAGAGA	CTGGTGATACTGCCGTGACA	61	117	4DL
wmc727	CATAATCAGGACAGCCGCAC	TAGTGGCCTGATGTATCTAGTTGG	61	138	5AL
wmc73	TTGTGCACCGCACTTACGTCTC	ACACCCGGTCTCCGATCCTTAG	61	189	5BL
WMC732-M13F-20	TGTAAAACGACGGCCAGTACTGCCCGTAGAACACCGTC	ACGGGGTTCTCCTTCCTCAA	61	296	1DL
wmc758	TAGGGGAGGCGACGGAG	GTTGCTGGAGAGTGGATTGC	61	246	7BL
wmc76	CTTCAGAGCCTCTTTCTCTACA	CTGCTTCACTTGCTGATCTTTG	51	256	7BS
WMC764-M13F-20	TGTAAAACGACGGCCAGTCCTCGAACCTGAAGCTCTGA	TTCGCAAGGACTCCGTAACA	61	180	2BS
WMC764-M13F-20	TGTAAAACGACGGCCAGTCCTCGAACCTGAAGCTCTGA	TTCGCAAGGACTCCGTAACA	61	180	2BS
WMC765-M13F-20	TGTAAAACGACGGCCAGTGGGATCAGACTGGGACTGGAG	GGGTTGGCTTGGCAGAGAA	61	167	5DL
WMC770-M13F-20	TGTAAAACGACGGCCAGTTGTCAGACTTCCTTTGATCCCC	AAGACCATGTGACGTCCAGC	61	135	2BS
WMC770-M13F-20	TGTAAAACGACGGCCAGTTGTCAGACTTCCTTTGATCCCC	AAGACCATGTGACGTCCAGC	61	135	2BS
wmc777	GCCATCAAGCGGATCAACT	GTAGCGCCCTGTTTCACCTC	Tm 61°	142	3BS
wmc78M-13-40	TTTCCCAGTCACGACGTTAgTAAATccTcccTTcggcTTc	AgcTTcTTTgcTAgTccgTTgc	61	241	3BS
wmc83	TggAggAAAcAcAATggATgcc	gAgTATcgccgAcgAAAgggAA	66		6BS
WMC83-M13F-20	TGTAAAACGACGGCCAGTTGGAGGAAACACAATGGATGCC	GAGTATCGCCGACGAAAGGGAA	61	160	7AS
wmc95	gTTTTTgTgATcccgggTTT	cATgcgTcAgTTcAAgTTTT	56		6B
wmc99	ATTACAATTGCTTCAGTGAGTG	TCATGATCATTGTTATAACGGT	51	158	5BL
